# Supplementary material for: African digital health strategic plans analysis: key weaknesses in contextualization, intervention focus, and technological foresight
Source: Research Square preprint supplement (doi:10.21203/rs.3.rs-6946631/v1), 2025-09-22
Supplement: Supplementary file 2 [file e6fc3984f5b86f16a946148b.xlsx]

## Sheet: Feuil1
Country	Plan availability	Valide Plan	Expired date	Elaborated before 2020	Plan not found	Country without plan	Started date	Ended date
Ghana	Yes	x					2023	2027
Zambia	Yes	x					2022	2026
Ethiopia	Yes	x					2021	2030
Guinea	Yes	x					2021	2025
Namibia	Yes	x					2021	2025
Burundi	Yes	x					2020	2024
Bostwana	Yes	x					2020	2024
Cameroon	Yes	x					2020	2024
DRC	Yes	x					2020	2024
Malawi	Yes	x					2020	2025
Tunisia	Yes	x					2020	2024
South Africa	Yes	x		x			2019	2024
Niger	Yes	x		x			2019	2023
Tanzania	Yes	x		x			2019	2024
Rwanda	Yes	x		x			2018	2023
Senegal	Yes	x		x			2018	2023
Sierra Leone	Yes	x		x			2018	2023
Kenya	yes	x		x			2016	2030
Nigeria	Yes		x	x			2015	2020
Angola	Yes	x		x			2010	NA
Uganda	Yes		x	x			2018	2021
Togo	Yes	x		x			2013	2015
Egypt	Yes		x	x			2012	2017
Cape Verde	Yes		x	x			2012	2016
Ivory Coast	Yes		x	x			2012	2016
Zimbabwe	Yes		x	x			2012	2017
Mauritius	Yes		x	x			2011	2014
Gambia	Yes		x	x			2009	2012
Morocco	Yes		x	x			2008	2012
Mauritania	Yes		x	x			2005	2006
Somalia	NA				x
Seychelles	NA				x
Equatorial Guinea	NA				x
Eswatini	NA				x
Eritrea	NA				x
Djibouti	NA				x
Benin	No					x
Comoros	No					x
Gabon	No					x
Liberia	No					x
Madagascar	No					x
Mozambique	No					x
Algeria	No					x
Burkina Faso	No					x
Central African Republic	No					x
Chad	No					x
Congo-Brazzaville	No					x
Guinea-Bissau	No					x
Lesotho	No					x
Libya	No					x
Mali	No					x
Sao Tome and Principe	No					x
South Sudan	No					x
Sudan	No					x
